# Supplementary material
Source: HighWire-hosted journal article supplement (https://erj.ersjournals.com/content/60/2/2102304)
Supplement: inline-supplementary-material-2 [file inline-supplementary-material-2.pdf]

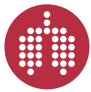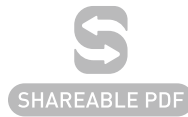

# Impact of hepatopulmonary syndrome in liver transplantation candidates and the role of angiogenesis

Steven M. Kawut <sup>1,2</sup>, Michael J. Krowka<sup>3</sup>, Kimberly A. Forde<sup>1,2</sup>, Nadine Al-Naamani<sup>1</sup>, Karen L. Krok<sup>4</sup>, Mamta Patel<sup>1,2</sup>, Carlo R. Bartoli<sup>5,6</sup>, Margaret Doyle <sup>7</sup>, Jude Moutchia<sup>2</sup>, Grace Lin<sup>3</sup>, Jae K. Oh<sup>3</sup>, Carl D. Mottram<sup>3</sup>, Paul D. Scanlon<sup>3</sup> and Michael B. Fallon<sup>8</sup> for the Pulmonary Vascular Complications of Liver Disease Study Group

<sup>1</sup>Dept of Medicine, Perelman School of Medicine, University of Pennsylvania, Philadelphia, PA, USA. <sup>2</sup>Center for Clinical Epidemiology and Biostatistics, Dept of Biostatistics, Epidemiology, and Informatics, Perelman School of Medicine, University of Pennsylvania, Philadelphia, PA, USA. <sup>3</sup>Dept of Medicine, Mayo Clinic, Rochester, MN, USA. <sup>4</sup>Dept of Medicine, Penn State Milton S. Hershey Medical Center, Hershey, PA, USA. <sup>5</sup>Division of Cardiovascular Surgery, Dept of Surgery, Perelman School of Medicine, University of Pennsylvania, Philadelphia, PA, USA. <sup>6</sup>Division of Cardiothoracic Surgery, Dept of Medicine, Geisinger Medical Center, Danville, PA, USA. <sup>7</sup>Dept of Pathology, University of Vermont, Burlington, VT, USA. <sup>8</sup>Dept of Medicine, University of Arizona, Phoenix, AZ, USA.

Corresponding author: Steven M. Kawut ([kawut@upenn.edu](mailto:kawut@upenn.edu))

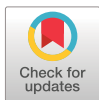

Shareable abstract (@ERSpublications)

The presence of hepatopulmonary syndrome with even mild oxygenation abnormalities was associated with shorter survival in candidates evaluated for liver transplantation and was characterised by higher levels of pro-angiogenic biomarkers <https://bit.ly/3Eaihtf>

**Cite this article as:** Kawut SM, Krowka MJ, Forde KA, *et al.* Impact of hepatopulmonary syndrome in liver transplantation candidates and the role of angiogenesis. *Eur Respir J* 2022; 60: 2102304 [DOI: 10.1183/13993003.02304-2021].

This single-page version can be shared freely online.

Copyright ©The authors 2022.  
For reproduction rights and  
permissions contact  
[permissions@ersnet.org](mailto:permissions@ersnet.org)

Received: 21 Aug 2021  
Accepted: 30 Nov 2021

## Abstract

**Background** Hepatopulmonary syndrome affects 10–30% of patients with cirrhosis and portal hypertension. We evaluated the serum angiogenic profile of hepatopulmonary syndrome and assessed the clinical impact of hepatopulmonary syndrome in patients evaluated for liver transplantation.

**Methods** The Pulmonary Vascular Complications of Liver Disease 2 study was a multicentre, prospective cohort study of adults undergoing their first liver transplantation evaluation. Hepatopulmonary syndrome was defined as an alveolar–arterial oxygen gradient  $\geq 15$  mmHg ( $\geq 20$  mmHg if age  $>64$  years), positive contrast-enhanced transthoracic echocardiography and absence of lung disease.

**Results** We included 85 patients with hepatopulmonary syndrome and 146 patients without hepatopulmonary syndrome. Patients with hepatopulmonary syndrome had more complications of portal hypertension and slightly higher Model for End-Stage Liver Disease–Na score compared to those without hepatopulmonary syndrome (median (interquartile range) 15 (12–19) *versus* 14 (10–17),  $p=0.006$ ). Hepatopulmonary syndrome patients had significantly lower 6-min walk distance and worse functional class. Hepatopulmonary syndrome patients had higher circulating angiopoietin 2, Tie2, tenascin C, tyrosine protein kinase Kit (c-Kit), vascular cell adhesion molecule 1 and von Willebrand factor levels, and lower E-selectin levels. Patients with hepatopulmonary syndrome had an increased risk of death (hazard ratio 1.80, 95% CI 1.03–3.16,  $p=0.04$ ), which persisted despite adjustment for covariates (hazard ratio 1.79, 95% CI 1.02–3.15,  $p=0.04$ ). This association did not vary based on levels of oxygenation, reflecting the severity of hepatopulmonary syndrome.

**Conclusion** Hepatopulmonary syndrome was associated with a profile of abnormal systemic angiogenesis, worse exercise and functional capacity, and an overall increased risk of death.
